# Supplementary material
Source: HighWire-hosted journal article supplement (https://erj.ersjournals.com/content/59/6/2102419)

## **External validation of a refined 4-strata risk assessment score from the French pulmonary arterial hypertension registry**

Athénaïs Boucly, Jason Weatherald, Laurent Savale, Pascal de Groote, Vincent Cottin, Grégoire Prévot, Ari Chaouat, François Picard, Delphine Horeau-Langlard, Arnaud Bourdin, Etienne-Marie Jutant, Antoine Beurnier, Mitja Jevnikar, Xavier Jaïs, Gérald Simonneau, David Montani, Olivier Sitbon, Marc Humbert

### Online Supplemental Materials

|                        |    |
|------------------------|----|
| Supplemental Table E1  | p2 |
| Supplemental Table E2  | p3 |
| Supplemental Table E3  | p4 |
| Supplemental Table E4  | p5 |
| Supplemental Figure E1 | p6 |
| Supplemental Figure E2 | p7 |
| Supplemental Figure E3 | p8 |

Supplemental Table E1 – Cox proportional hazards regression models for overall survival at baseline and after 1<sup>st</sup> reassessment.

| <b>Baseline Risk Assessment</b> | <b>Hazard Ratio</b> | <b>95% CI</b> | <b>1<sup>st</sup> Follow-up Risk Assessment</b> | <b>Hazard Ratio</b> | <b>95% CI</b> |
|---------------------------------|---------------------|---------------|-------------------------------------------------|---------------------|---------------|
| <u>3-Strata</u>                 |                     |               | <u>3-Strata</u>                                 |                     |               |
| Low                             | -                   |               | Low                                             | -                   |               |
| Intermediate                    | 2.24                | 1.81-2.78     | Intermediate                                    | 3.39                | 2.80-4.10     |
| High                            | 4.24                | 3.34-5.39     | High                                            | 8.95                | 6.83-11.73    |
|                                 |                     |               |                                                 |                     |               |
| <u>4-Strata</u>                 |                     |               | <u>4-Strata</u>                                 |                     |               |
| Low                             | -                   |               | Low                                             | -                   |               |
| Intermediate-low                | 1.82                | 1.37-2.42     | Intermediate-low                                | 2.65                | 2.11-3.17     |
| Intermediate-high               | 3.20                | 2.44-4.19     | Intermediate-high                               | 5.65                | 4.50-7.11     |
| High                            | 5.19                | 3.88-6.94     | High                                            | 11.08               | 8.23-14.92    |

Hazard ratios with reference to the low-risk group. Abbreviations: CI – confidence interval

Supplemental Table E2 – Initial treatment strategies for patients diagnosed in 2009-2014 compared to those diagnosed in 2015-2020

|                | 2009-2014 (n=1401) | 2015-2020 (n=1478) |
|----------------|--------------------|--------------------|
| CCB only       | 81 (6%)            | 86 (6%)            |
| Monotherapy    | 808 (58%)          | 589 (40%)          |
| Dual therapy   | 326 (23%)          | 470 (31.5%)        |
| Triple Therapy | 37 (3%)            | 42 (3%)            |
| None           | 149 (10%)          | 291 (19%)          |

Supplemental Table E3 – Cox Proportional Hazards regression models for the 3 and 4-strata methods applied to patients diagnosed 2009-2014 and 2015-2020.

|                   | 2009-2014 (n=1401) |            |        | 2015-2020 (n=1478) |            |        |
|-------------------|--------------------|------------|--------|--------------------|------------|--------|
|                   | Baseline           |            |        | Baseline           |            |        |
|                   | HR                 | 95%CI      | p      | HR                 | 95%CI      | p      |
| <b>3 Strata</b>   |                    |            |        |                    |            |        |
| Low (Ref)         | -                  |            |        | -                  |            |        |
| Intermediate      | 2.41               | 1.85-3.12  | <0.001 | 2.02               | 1.37-3.0   | <0.001 |
| High              | 4.12               | 3.06-5.56  | <0.001 | 4.64               | 3.04-7.07  | <0.001 |
| <b>4 Strata</b>   |                    |            |        |                    |            |        |
| Low (Ref)         | -                  |            |        | -                  |            |        |
| Intermediate-low  | 1.78               | 1.27-2.49  | 0.001  | 2.02               | 1.18-3.45  | 0.01   |
| Intermediate-high | 3.16               | 2.29-4.37  | <0.001 | 3.38               | 2.02-5.65  | <0.001 |
| High              | 4.71               | 3.31-6.71  | <0.001 | 6.45               | 3.79-11.0  | <0.001 |
|                   | Follow-up          |            |        | Follow-up          |            |        |
|                   | HR                 | 95%CI      | p      | HR                 | 95%CI      | p      |
| <b>3 Strata</b>   |                    |            |        |                    |            |        |
| Low (Ref)         | -                  |            |        | -                  |            |        |
| Intermediate      | 3.87               | 3.07-4.87  | <0.001 | 2.32               | 1.66-3.24  | <0.001 |
| High              | 8.68               | 6.20-12.13 | <0.01  | 6.56               | 4.26-10.1  | <0.001 |
| <b>4 Strata</b>   |                    |            |        |                    |            |        |
| Low (Ref)         | -                  |            |        | -                  |            |        |
| Intermediate-low  | 2.85               | 2.18-3.71  | <0.001 | 1.96               | 1.30-2.98  | 0.001  |
| Intermediate-high | 6.33               | 4.81-8.32  | <0.001 | 4.12               | 2.74-6.18  | <0.001 |
| High              | 9.99               | 6.94-14.37 | <0.001 | 8.76               | 5.39-14.23 | <0.001 |

Supplemental Table E4 – Cox Proportional Hazards regression models for the 3 and 4-strata methods after excluding 295 patients who died within 1 year of diagnosis (n=2584).

| <b>Baseline Risk Assessment</b> | <b>Hazard Ratio</b> | <b>95% CI</b> | <b>Harrell's C</b> | <b>1<sup>st</sup> Follow-up Risk Assessment</b> | <b>Hazard Ratio</b> | <b>95% CI</b> | <b>Harrell's C</b> |
|---------------------------------|---------------------|---------------|--------------------|-------------------------------------------------|---------------------|---------------|--------------------|
| <u>3-Strata</u>                 |                     |               | 0.59               | <u>3-Strata</u>                                 |                     |               | 0.65               |
| Low                             | -                   |               |                    | Low                                             | -                   |               |                    |
| Intermediate                    | 2.03                | 1.61-2.56     |                    | Intermediate                                    | 3.32                | 2.72-4.05     |                    |
| High                            | 3.30                | 2.51-4.34     |                    | High                                            | 7.61                | 5.68-10.19    |                    |
|                                 |                     |               |                    |                                                 |                     |               |                    |
| <u>4-Strata</u>                 |                     |               | 0.61               | <u>4-Strata</u>                                 |                     |               | 0.69               |
| Low                             | -                   |               |                    | Low                                             | -                   |               |                    |
| Intermediate-low                | 1.65                | 1.22-2.22     |                    | Intermediate-low                                | 2.57                | 2.03-3.24     |                    |
| Intermediate-high               | 2.70                | 2.02-3.59     |                    | Intermediate-high                               | 5.52                | 4.35-7.01     |                    |
| High                            | 3.85                | 2.79-5.31     |                    | High                                            | 9.22                | 6.71-12.67    |                    |

Supplemental Figure E1 – Overall survival for newly diagnosed pulmonary arterial hypertension patients from January 1, 2009 until December 31, 2020

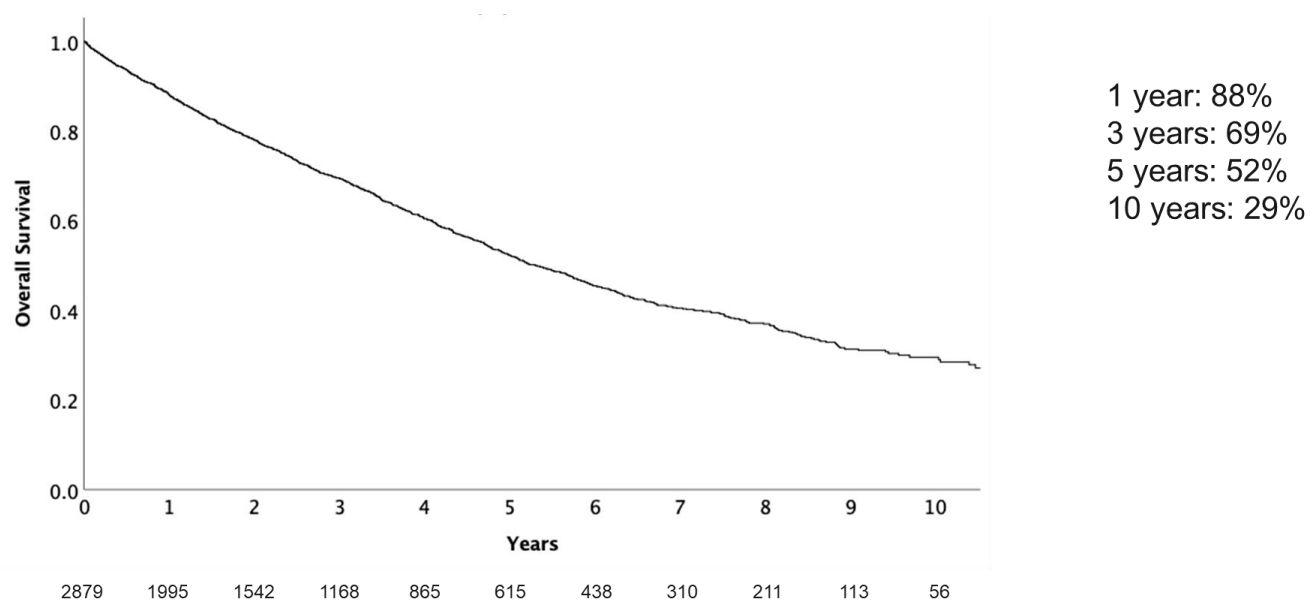

Supplemental Figure E2 - Risk stratification using the 4-strata model among patient subgroups. Those with idiopathic, heritable, and drug or toxin-induced PAH at baseline (A) and after first follow-up (B). Those with connective tissue disease-associated PAH at baseline (C) and after first follow-up (D). Those with systemic sclerosis-associated PAH at baseline (E) and after first follow-up (F). Log-rank test  $p < 0.001$  for each panel.

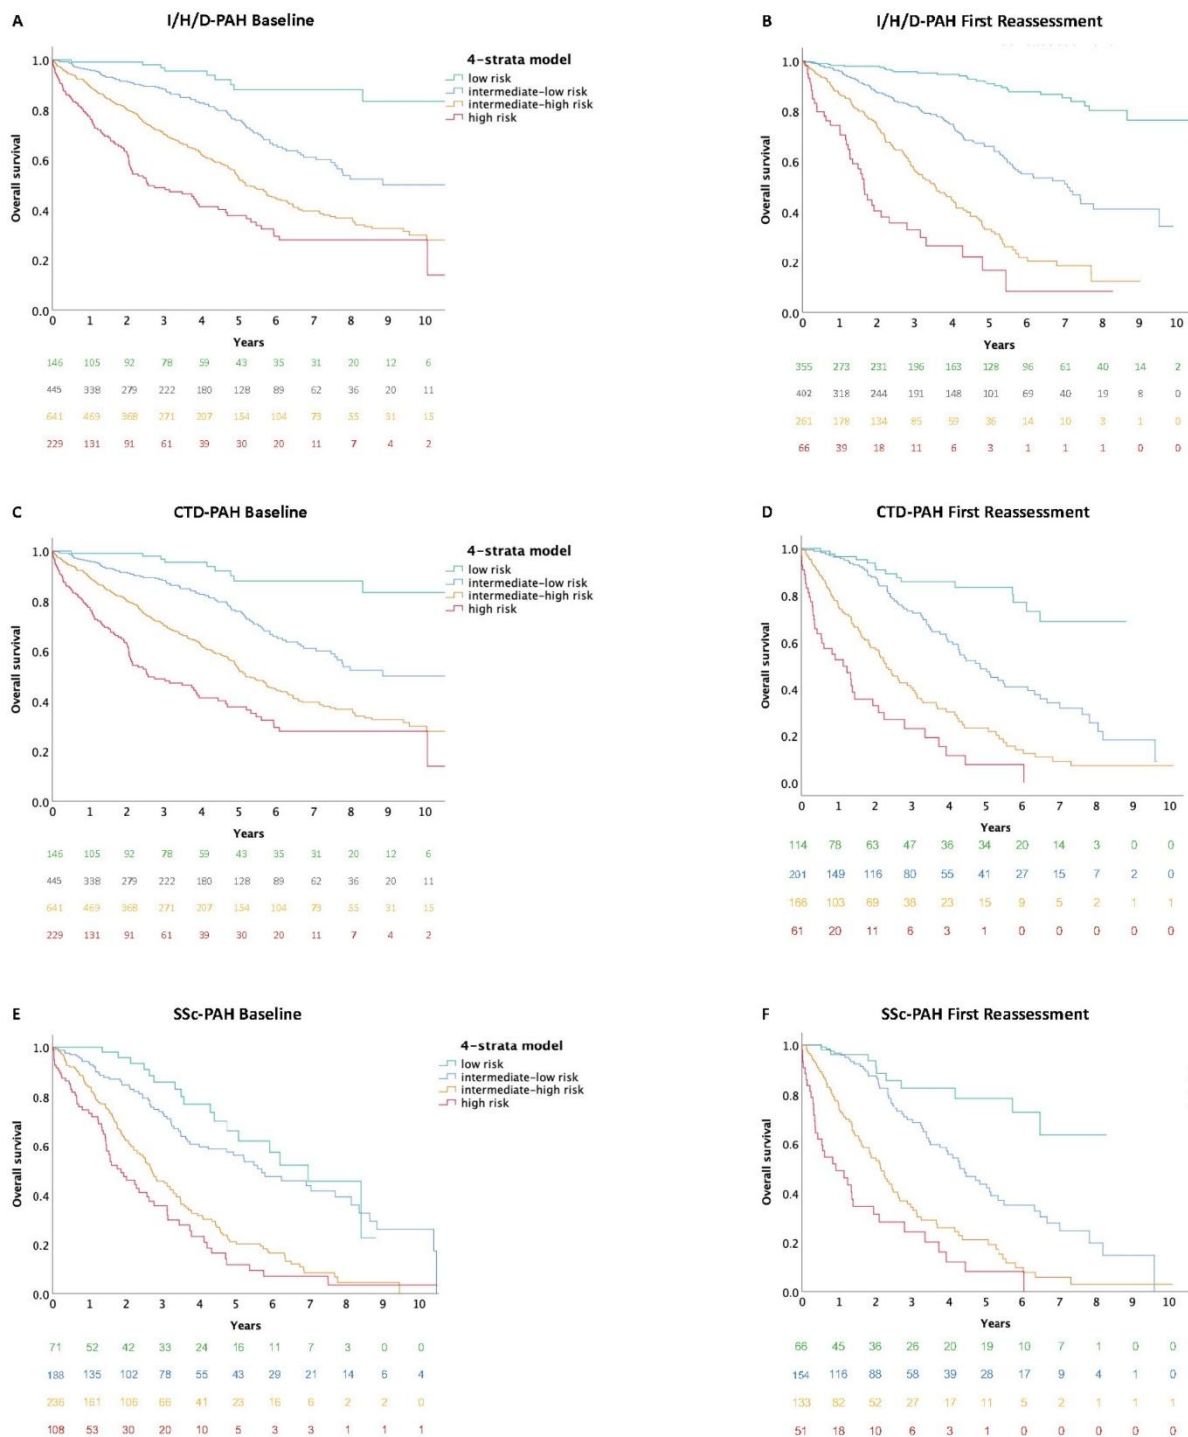

Supplemental Figure E3 – Survival by 4-strata risk groups for patients with portopulmonary hypertension after diagnosis (A) and after first reassessment (B). Log-rank test  $p=0.007$  for (A) and  $p<0.001$  for (B).

(A)

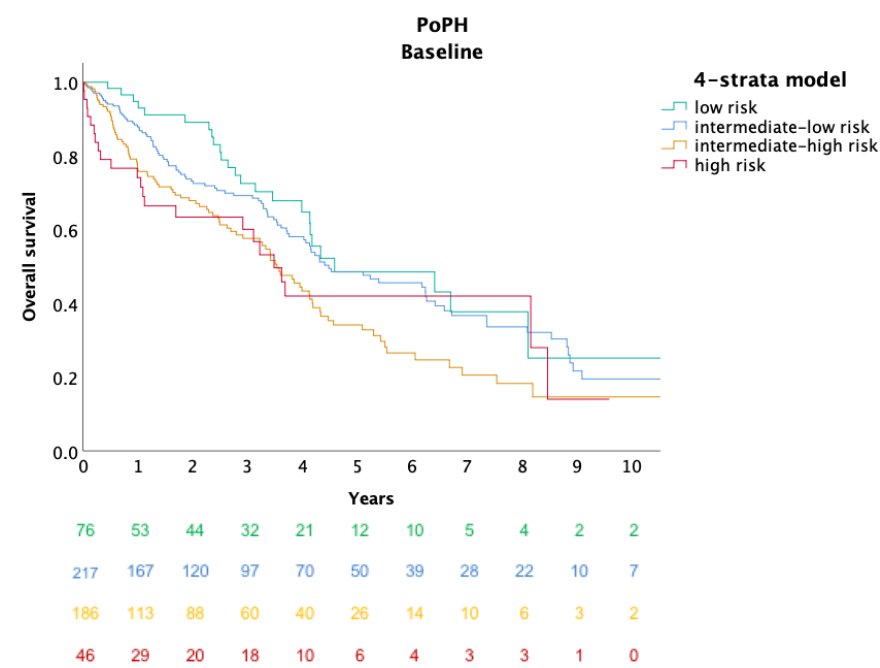

(B)

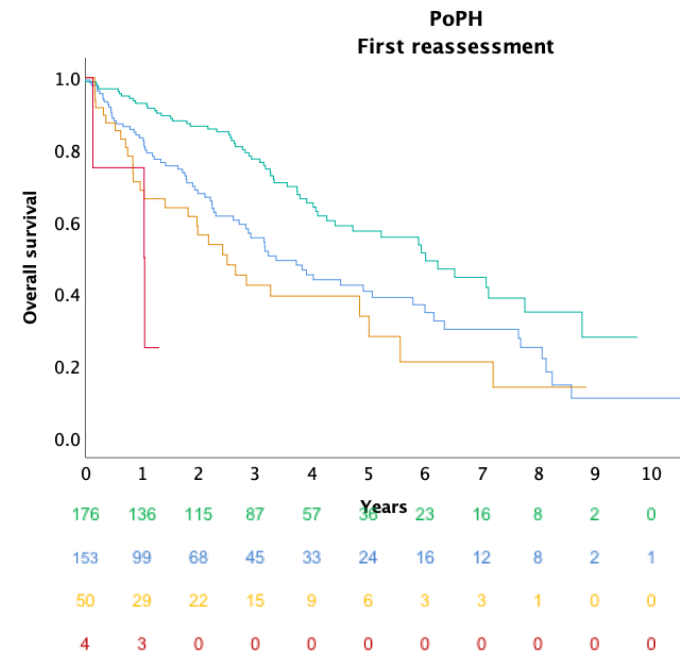

Supplement: inline-supplementary-material-1 [file inline-supplementary-material-1.pdf]
